# Supplementary material for: Analysis of genetic structure and function of clustered regularly interspaced short palindromic repeats loci in 110 Enterococcus strains
Source: Frontiers journal article supplement (doi:10.3389/fmicb.2023.1177841), 2023-04-24
Supplement: Table_3.XLSX [file Table_3.XLSX]

## Sheet: Sheet1
II-A		strain	genome number		CRISPR(confiremed)	CRISPR type	ST	antibiotic resistance gene	Repeat		Spacer
	Cas9-Cas1-Cas2-Csn2	Enterococcus faecium BM4105-RF	GCF_003269465.1	CP030110.1	1	II-A	ST172	msrC、AAC(6')-Ii、eatAv	GTTTTAGAGCTATGCTGATTTGAATGCTTCCAAAAC
	Cas9-Cas1-Cas2-Csn2	Enterococcus faecium SRCM103341	GCF_004101385.1	CP035136.1	1	II-A	ST2107（CC94)	efmA、AAC(6')-Ii、eatAv	GTTTTAGAGCTATGCTGATTTGAATGCTTCCAAAAC
	Cas9-Cas1-Cas2-Csn2	Enterococcus faecium SRCM103470	GCF_004103475.1	CP035220.1	1	II-A		AAC(6')-Ii、eatAv	GTTTTAGAGCTATGCTGATTTGAATGCTTCCAAAAC
	Cas9-Cas1-Cas2-Csn2	Enterococcus faecium HY07	GCF_003574925.1	CP032308.1	1	II-A		AAC(6')-Ii、eatAv	GGTTTTAGAGCTATGCTGATTTGAAT
	Cas9-Cas1-Cas2-Csn2	Enterococcus durans VREdu c4ddcd9	GCF_007999025.2	NZ_CP042597.1	1	II-A		vanA、tetM、AAC(6')-Iih、ErmB、tet(45)	CGTTTTAGAGCTATGTTGTTTTGAATG
	Csn2-Cas2-Cas1-Cas9	Enterococcus durans BDGP3	GCF_002277935.1	NZ_CP022930.1	1	II-A		AAC(6')-Iih	GTTTTGGAAGCATTCAAAACAACATAGCTCTAAAAC
	Cas9-Cas1-Cas2-Csn2	Enterococcus sp. DA9	GCF_008000875.1	CP042839.1	1	II-A		msrC、AAC(6')-Ii、eatAv	GTTTTAGAGCTATGCTGATTTGAATGCTTCCAAAAC		5
	Cas9-Cas1-Cas2-Csn2	Enterococcus mundtii 15-1A	GCF_013394305.1	AP019810.1	1	II-A			GTTTTAGAGCTATGTTGAATTGAATGCTTCCAAAAC
	Cas9-Cas1-Cas2-Csn2	Enterococcus mundtii Pe103	GCF_005158285.1	CP029066.1	1	II-A			GTTTTAGAGCTATGTTGAATTGAATGCTTCCAAAAC
	Cas9-Cas1-Cas2-Csn2	Enterococcus mundtii P6	GCF_020149485.1	CP083695.1	1	II-A			GTTTTAGAGCTATGTTGAATTGAATGCTTCCAAAAC
	Cas9-Cas1-Cas2-Csn2	Enterococcus hirae ATCC 9790	GCF_000271405.2	CP003504.1	1	II-A		AAC(6')-Iid	GTTTTAGAGCTATGTTGTTTTGAATGCTTCCAAAA
	Cas9-Cas1-Cas2-Csn2	Enterococcus hirae NCTC12368	GCF_900636615.1	NZ_LR134297.1	1	II-A		AAC(7')-Iid	GTTTTAGAGCTATGTTGTTTTGAATGCTTCCAAAA
	Cas9-Cas1-Cas2-Csn2	Enterococcus faecalis W11	GCF_002355755.1	NZ_AP017623.1	1	II-A	ST864	dfrE、efrA	GTTTTAGAGTCATGTTGTTTAGAATGGTACCAAAAC
	Csn2-Cas2-Cas1-Cas9	Enterococcus faecalis 133170041-3	GCA_013344605.1	CP046108_2	2	II-A	ST40	efrA、dfrE、tetM	GTTTTAGAGTCATGTTGTTTAGAATGGTACCAAAACT
			CP046108.1	CP046108_3					GTTTTGGTACCATTCTAAACAACATGACTCTAAAAC
	Csn2-Cas2-Cas1-Cas9	Enterococcus faecalis FDAARGOS_611	GCF_006364815.1	CP041012_1	2	II-A	ST55	lsaA、efrA、dfrE	GTTTTAGAGTCATGTTGTTTAGAATGGTACCAAAAC
			CP041012.1	CP041012_2					GTTTTGGTACCATTCTAAACAACATGACTCTAAAAC
	Csn2-Cas2-Cas1-Cas9	Enterococcus faecalis HA-1	GCF_006349345.1	CP040898_3	2	II-A	ST16	efrA、ErmB、dfrE、tetM	GTTTTAGAGTCATGTTGTTTAGAATGGTACCAAAAC
			CP040898.1	CP040898_4					GTTTTGGTACCATTCTAAACAACATGACTCTAAAAC
	Csn2-Cas2-Cas1-Cas9	Enterococcus faecalis JY32	GCF_010103655.1	CP045045_3	2	II-A	ST16	efrA、catA8、ErmB、dfrE、tetM	GTTTTAGAGTCATGTTGTTTAGAATGGTACCAAAAC
			CP045045.1	CP045045_4					GTTTTGGTACCATTCTAAACAACATGACTCTAAAAC
	Cas9-Cas1-Cas2-Csn2	Enterococcus faecalis D32	GCF_000281195.1	CP003726_1	2	II-A	ST40	dfrE、efrA	GTTTTAGAGTCATGTTGTTTAGAATGGTACCAAAAC
			CP003726.1	CP003726_2					GTTTTGGTACCATTCTAAACAACATGACTCTAAAAC
	Cas9-Cas1-Cas2-Csn2	Enterococcus faecalis TH4125	GCF_012594215.1	CP051005_1	2	II-A	ST16	AAC(6')-Ie-APH(2'')-Ia、APH(3')-IIIa、dfrG、tetM、dfrE、ErmB、SAT-4、ErmB、efrA	GTTTTAGAGTCATGTTGTTTAGAATGGTACCAAAAC
			CP051005.1	CP051005_2					GTTTTGGTACCATTCTAAACAACATGACTCTAAAAC
	Cas9-Cas1-Cas2-Csn2	Enterococcus faecalis NCTC8745	GCF_900636775.1	LR134312_1	2	II-A	ST22	dfrE、efrA	GTTTTAGAGTCATGTTGTTTAGAATGGTACCAAAAC
			LR134312.1	LR134312_2					GTTTTGGTACCATTCTAAACAACATGACTCTAAAAC
	Cas9-Cas1-Cas2-Csn2	Enterococcus faecalis OG1RF	GCF_000172575.2	CP002621_1	2	II-A	ST1	dfrE、efrA	GTTTTAGAGTCATGTTGTTTAGAATGGTACCAAAACT
			CP002621.1	CP002621_2					AGTTTTGGTACCATTCTAAACAACATGACTCTAAAAC
	Cas9-Cas1-Cas2-Csn2	Enterococcus faecalis OG1RF a23be81	GCF_004006275.1	CP025020_1	2	II-A	ST1	dfrE、efrA	GTTTTAGAGTCATGTTGTTTAGAATGGTACCAAAACT
			CP025020.1	CP025020_2					AGTTTTGGTACCATTCTAAACAACATGACTCTAAAAC
CP022059.2	Csn2-Cas2-Cas1-Cas9	Enterococcus faecalis FDAARGOS_338	GCF_002208945.1	CP022059_1	2	II-A	ST19	tetM、efrA、dfrE	GTTTTGGTACCATTCTAAACAACATGACTCTAAAAC
				CP022059_2					GTTTTGGTACCATTCTAAACAACATGACTCTAAAAC
CP039752.1	Cas9-Cas1-Cas2-Csn2	Enterococcus faecalis 110	GCF_005154485.1	CP039752_1	2	II-A	ST55	lsaA、efrA、dfrE	GTTTTAGAGTCATGTTGTTTAGAATGGTACCAAAAC
				CP039752_2					GTTTTGGTACCATTCTAAACAACATGACTCTAAAAC
NZ_CP055230.1	Cas9-Cas1-Cas2-Csn2	Enterococcus hirae 13152	GCF_013391165.1	CP055230_1	2	II-A		AAC(6')-Iid	CATTCAAAACAACATAGCTCTAAAAC
				CP055230_3					GGTTTTAGAGCTATGTTGTTTTGAATGCTTCCAAAAC
NZ_CP055232.1	Cas9-Cas1-Cas2-Csn2	Enterococcus hirae 708	GCF_013391205.1	CP055232_1	2	II-A		AAC(6')-Iid	GTTTTGGAAGCATTCAAAACAACATAGCTCTAAAAC
				CP055232_3					GTTTTAGAGCTATGTTGTTTTGAATGCTTCCAAAAC
CP037955.1	Csn2-Cas2-Cas1-Cas9	Enterococcus hirae CQP3-9	GCF_012222705.1	CP037955_3	2	II-A		ANT(6)-Ia、AAC(6')-Iid	CATTCAAAACAACATAGCTCTAAAAC
				CP037955_4					TTTTGGAAACATTCAAAACAACATAGCTCTAAAACC
CP015516.1	Csn2-Cas2-Cas1-Cas9	Enterococcus hirae R17	GCF_001641305.1	CP015516_2	2	II-A		AAC(6')-Iid	GTTTTAGAGCTATGTTGTTTTGAATGCTTCCAAAACA
				CP015516_3					TGTTTTGGAAGCATTCAAAACAACATAGCTCTAAAAC
CP023011.2	Cas9-Cas1-Cas2-Csn2	Enterococcus hirae FDAARGOS_234	GCF_002278015.2	CP023011_2	2	II-A		AAC(6')-Iid	GTTTTAGAGCTATGTTGTTTTGAATGCTTCCAAAAC		5
				CP023011_3					GTTTTGGAAGCATTCAAAACAACATAGCTCTAAAAC		2
	Csn2-Cas2-Cas1-Cas9	Enterococcus durans KCTC 13289	GCF_015999505.1	NZ_CP065535.1	0	II-A		AAC(6')-Iih
	Cas9-Cas1-Cas2-Csn2	Enterococcus durans KLDS 6.0930	GCF_001267865.1	CP012384.1	0	II-A		AAC(6')-Iih
	Cas9-Cas1-Cas2-Csn2	Enterococcus durans KLDS6.0933	GCF_001267395.1	NZ_CP012366.1	0	II-A		AAC(6')-Iih
	Csn2-Cas2-Cas1-Cas9	Enterococcus durans VREdu	GCF_007997775.1	NZ_CP042598.1	0	II-A		vanA、AAC(6')-Iih、tet(45)
CP042289.1	Csn2-Cas2-Cas1-Cas9	Enterococcus hirae HDC14-2	GCF_014218175.1		0	II-A		AAC(6')-Iid
CP068483.1	Csn2-Cas2-Cas1-Cas9	Enterococcus hirae FDAARGOS_1123	GCF_016766815.1		0	II-A		AAC(6')-Iid
CP055229.1	Csn2-Cas2-Cas1-Cas9	Enterococcus hirae 13344	GCF_013391145.1		0	II-A		AAC(6')-Iid
	Cas9-Cas1-Cas2-Csn2	Enterococcus thailandicus a523	GCF_002290025.1	CP023074.1	5	II-A		lnuG、tetS、AAC(6')-Ii	GTTTTAGAGCTATGTTGTTTTGAATGCTTCCAAAAC
				CP023074.2					GTTTTAGAGCTATGCTGTTTTGAATGCTTCCAAAAC
				CP023074.3					GTTTTAGAGCTATGCTGTTTTGAATGCTTCCAAAAC
				CP023074.4					GTTTTGGAAGCATTCAAAACAGCATAGCTCTAAAAC
				CP023074.6					GTTTTGGAAGCATTCTAAACAACATAGCTCTAAAAC
I-C	Cas3-Cas5-Cas8c-Cas7-Cas4-Cas1-Cas2	Enterococcus cecorum SA3	GCF_001318405.1	CP010064.1	1	I-C		ErmG、ErmB、lnuC、tetM、tet(45)	GTCTCACCTTACATAGGTGAGTGGATTGAAAT
	Cas2-Cas1-Cas4-Cas7-Cas8c-Cas3-Cas5	Enterococcus silesiacus LMG 23085	GCA_001465115.1	CP013614.2	4	I-C		qacG、efrA	ATTTCAATCCACTCACTCTAGATTAGAGTGAGAC
				CP013614.3					ATTTCAATCCACTCACTCAATAAAGAGTGAGAC
				CP013614.4					ATTTCAATCCACTAGCTCTAAACAGAGCTAGAC
				CP013614.5					ATTTCAATCCACTAGCTCTAAACAGAGCTAGAC
II-C	Cas9-Cas1-Cas2-Csn2	Enterococcus cecorum NCTC12421	GCF_900474605.1	LS483306.1	1	II-C		ErmB、tetO	GTTTTTGTACTCTTAATGATGTGGTATCAGTAAAAC
	Csn2-Cas2-Cas1-Cas9	Enterococcus faecalis DM01	GCF_006766145.1	CP041344.1	1	II-C	ST695	dfrE、efrA	GTTTTACTGATAAGAAATTATTGAGAGTACAAAAAC
AP018543.1	Cas9-Csn2-Cas2-Cas1	Enterococcus faecalis KUB3007	GCF_003966405.1	AP018543_1	2	II-C	ST729	dfrG、lsaA、dfrE、clcD、efrA、tetM	GTTTTACTGATAAGAAATTATTGAGAGTACAAAAAC
				AP018543_2					GTTTTGGTACCATTCTAAACAACATGACTCTAAAAC
AP018538.1	Csn2-Cas2-Cas1-Cas9	Enterococcus faecalis KUB3006	GCF_003966385.1	AP018538_1	2	II-C	ST729	dfrG、lsaA、dfrE、clcD、efrA、tetM	GTTTTACTGATAAGAAATTATTGAGAGTACAAAAAC
				AP018538_2					GTTTTGGTACCATTCTAAACAACATGACTCTAAAAC
CP015883.1	Csn2-Cas2-Cas1-Cas9	Enterococcus faecalis sorialis	GCF_002163735.1	CP015883_1	2	II-C	ST65	dfrE、efrA	GTTTTACTGATAAGAAATTATTGAGAGTACAAAAAC		7
				CP015883_2					TTGTTTTGGTACCATTCCAAACAACATGACTCTAAAACT		3
I-B
CP034169.1	Cas6-Cas8a-Cas7-Cas5-Cas3-Cas4-Cas1-Cas2	Enterococcus avium 352	GCF_005347505.1	CP034169.1	1	I-B		tetM	GTCTAAATCTAAAAATAGTGGAATGTAAAT		23
two cas loci	Csn2-Cas2-Cas1-Cas9-----II-C	Enterococcus faecalis CVM N60443F	GCF_004332035.1	CP028724_1	3	II-C、II-A	ST489	efrA、tet(W/N/W)、ErmB、dfrE	GTTTTACTGATAAGAAATTATTGAGAGTACAAAAAC
	Cas9-Cas1-Cas2-Csn2-----II-A	（CP028724.1）		CP028724_2					GTTTTGGTACCATTCTAAACAACATGACTCTAAAAC
				CP028724_5					GTTTTAGAGTCATGTTGTTTAGAATGGTACCAAAAC
		Enterococcus faecalis	GCF_902379005.2	LR698844.1	1	0	ST248	lsaA、dfrE、efrA	GTTTTGGTACCATTCTAAACAACATGACTCTAAAAC
		Enterococcus faecalis 0a43e31	GCF_905122375.1	LR962432.1	1	0	ST1137	AAC(6')-Ie-APH(2'')-Ia、dfrE、efrA、dfrF	GTTTTGGTACCATTCCAAACAACATGACTCTAAAAC
		Enterococcus faecalis 0bee157	GCF_905122505.1	LR962468.1	1	0	ST260	dfrE、efrA	TTGTTTTGGTACCATTCCAAACAACATGACTCTAAAACT
		Enterococcus faecalis 1263262	GCF_905121485.1	LR962178.1	1	0	ST209	dfrE、efrA	GTTTTGGTACCATTCTAAACAACATGACTCTAAAAC
		Enterococcus faecalis 133-1	GCF_022212905.1	CP091892.1	1	0	ST777	dfrE、efrA、tetM	GTTTTGGTACCATTCTAAACAACATGACTCTAAAAC
		Enterococcus faecalis 142-1	GCF_022212885.1	CP091889.1	1	0	ST777	dfrE、efrA、tetM	GTTTTGGTACCATTCTAAACAACATGACTCTAAAAC
		Enterococcus faecalis AMB05	GCF_001931845.1	CP015998.1	1	0	ST21	dfrE、efrA	GTTTTGGTACCATTCTAAACAACATGACTCTAAAAC
		Enterococcus faecalis 152	GCF_022212845.1	CP091884.1	1	0	ST179	APH(3')-IIIa、AAC(6')-Ie-APH(2'')-Ia、tetM、dfrE。ErmB、SAT-4、efrA	GTTTTGGTACCATTCTAAACAACATGACTCTAAAAC
		Enterococcus faecalis 2-1	GCF_022213025.1	CP091906.1	1	0	ST59	tetM、tet(45)、dfrE、efrA	GTTTTGGTACCATTCTAAACAACATGACTCTAAAAC
		Enterococcus faecalis 43-2	GCF_022213005.1	CP091904.1	1	0	ST64	dfrE、efrA、tetM	GTTTTAGAGTCATGTTGTTTAGAATGGTACCAAAAC
HF558530.1		Enterococcus faecalis str. Symbioflor 1	GCF_000317915.1	HF558530.1	1	0	ST248	lsaA、dfrE、efrA	GTTTTGGTACCATTCTAAACAACATGACTCTAAAAC
CP030045.1		Enterococcus faecalis C54	GCF_005979305.1		1	0	ST74	lsaA、dfrE、efrA、fexA	GTTTTGGTACCATTCTAAACAACATGACTCTAAAAC
CP082231.1		Enterococcus faecalis E006	GCF_019856595.1		1	0	ST692	dfrE、efrA	GTTTTGGTACCATTCCAAACAACATGACTCTAAAAC
CP086411.1		Enterococcus faecalis R5	GCF_020881975.1		1	0	ST97	dfrE、efrA、tetM	GTTTTGGTACCATTCTAAACAACATGACTCTAAAAC
CP014949.1		Enterococcus faecalis LD33	GCF_001598635.1		1	0	ST25	dfrE、efrA	GTTTTGGTACCATTCTAAACAACATGACTCTAAAAC
CP002491.1		Enterococcus faecalis 62	GCF_000211255.2		1	0	ST766	dfrE、efrA、tetM	GTTTTGGTACCATTCTAAACAACATGACTCTAAAAC
CP004081.1		Enterococcus faecalis DENG1	GCF_000550745.1		1	0	ST191	dfrE、efrA、tetM	GTTTTGGTACCATTCTAAACAACATGACTCTAAAAC
CP036249.1		Enterococcus faecalis R712	GCF_009662495.1		1	0	ST103	dfrE、efrA、tetM	GTTTTGGTACCATTCTAAACAACATGACTCTAAAAC
CP015410.2		Enterococcus faecalis KB1	GCF_001689055.2		1	0	ST9	dfrE、efrA	GTTTTGGTACCATTCCAAACAACATGACTCTAAAAC
CP008816.1		Enterococcus faecalis ATCC 29212	GCF_000742975.1		1	0	ST30	lsaA、dfrE、tetM、efrA	GTTTTGGTACCATTCTAAACAACATGACTCTAAAAC
		Enterococcus avium G-15						None
No confirmed CRISPR
CP059739.1		Enterococcus faecium A4694	GCF_012933245.2			CC17	ST80	efmA、AAC(6')-Ii、eatAv
AP024837.1		Enterococcus faecium AA622	GCF_019977575.1			CC18	ST17	dfrG、tet(W/N/W)、tetM、tet(45)、AAC(6')-Ii、vanI、vanD
CP003583.1		Enterococcus faecium DO				CC17	ST18	efmA、AAC(6')-Ii
CP021885.1		Enterococcus faecium WEFA23	GCF_002850515.1				ST66	efmA、AAC(6')-Ii、eatAv
CP025022.1		Enterococcus faecium Com15	GCF_004006255.1				ST583	AAC(6')-Ii、eatAv
LR134337.1		Enterococcus faecium NCTC7174	GCF_900637035.1				ST1034	efmA、AAC(6')-Ii
CP011828.1		Enterococcus faecium UW8175	GCF_001587115			CC17	ST904	efmA、AAC(6')-Ii
CP033041.1		Enterococcus faecium JE1	GCF_003667965.1				ST812	AAC(6')-Ii、eatAv
CP068244.1		Enterococcus faecium fac90	GCF_016743855.1				ST868	efmA、AAC(6')-Ii、eatAv、fexA
CP040907.1		Enterococcus faecium FB-1	GCF_006351785.1				ST19	efmA、AAC(6')-Ii、eatAv、mefH
LN999844.1		Enterococcus faecium 2dc253c	GCF_900066025.1				ST54	efmA、AAC(6')-Ii、eatAv
CP072884.1		Enterococcus faecium F179	GCF_019175465.1				ST22	efmA、AAC(6')-Ii
CP081504.1		Enterococcus faecium E843-TC	GCA_019774555.1				ST515	tetM、AAC(6')-Ii、eatAv
CP040368.1		Enterococcus faecium VB3240				CC17	ST17	tetM、tet(45)、ErmT、efmA、AAC(6')-Ii、eatAv
CP085894.1		Enterococcus faecium SC1762	GCF_020736585.1				ST976	AAC(6')-Ii
CP047326.1		Enterococcus faecium 116	GCF_018279145.1			CC17	ST32	efmA、AAC(6')-Ii
CP091100.1		Enterococcus faecium P47				CC17	ST29	dfrG、AAC(6')-Ii、efmA、eatAv
		Enterococcus faecium T110	GCF_000737555.1	CP006030.1			ST812	AAC(6')-Ii、eatAv
		Enterococcus faecium	GCF_020162155.1	CP083912.1		CC17	ST18	efmA、dfrG、AAC(6')-Ii、tet(M)
		Enterococcus faecium UC7251	GCF_000411655.2	CP084886.1		CC17	ST673	AAC(6')-Ii、tet(M)
		Enterococcus faecium DMEA02	GCF_008330605.1	CP043484.1		CC94	ST178	AAC(6')-Ii、eatAv
		Enterococcus faecium E1	GCF_001886635.1	CP018065.1		CC17	ST117	dfrG、mefH、efmA、AAC(6')-Ii、dfrF
		Enterococcus faecium a430a0f	GCF_020162175.1	CP083920.1		CC17	ST18	dfrG、efmA、AAC(6')-Ii、tet(M)
		Enterococcus faecium 0396ef8	GCF_900639535.1	LR135344.1		CC17	ST117	efmA、AAC(6')-Ii、dfrG、dfrF
		Enterococcus faecium NMVRE-001	GCF_021228615.1	CP089319.1		CC17	ST584	dfrG、efmA、AAC(6')-Ii、tet(M)、tet(45)、dfrF
		Enterococcus faecium 16-346	GCF_002761555.1	CP021849.1		CC17	ST121	vanG、tet(M)、ErmT、AAC(6')-Ii
		Enterococcus faecium 36c445d	GCF_900639385.1	LR135219.1		CC17	ST17	efmA、AAC(6')-Ii
		Enterococcus faecium 460d201	GCF_900638765.1	LR135169.1			ST1141	ANT(6)-Ia、efmA、AAC(6')-Ii
		Enterococcus faecium d5c749	GCF_900638785.1	LR135181.1		CC17	ST18	dfrG、efmA、APH(3')-IIIa、tet(M)、SAT-4、aad(6)、ErmB、AAC(6')-Ii
		Enterococcus faecium fac90	GCF_016743855.1	CP068244.1			ST868	efmA、 AAC(6')-Ii、eatAv
		Enterococcus faecium FS 86	GCA_013201055.1	CP053704.1		CC94	ST296	AAC(6')-Ii、eatAv
		Enterococcus faecium Gr17	GCF_003711605.1	CP033376.1			ST1985	AAC(6')-Ii、eatAv
		Enterococcus cecorum CE3	GCA_001318365.1	CP010063.1				ErmB、
AE016830.1		Enterococcus faecalis V583					ST6	dfrE、vanB、efrA
LR962421.1		Enterococcus faecalis d857975	GCF_905122295.1				ST1165	dfrE、efrA、tetM
CP073085.1		Enterococcus faecalis L17					ST330	lnuG、dfrE、efrA
		Enterococcus mundtii (firmicutes) DSM 4838
		Enterococcus mundtii (firmicutes) EMB156	CP022340.1
		Enterococcus mundtii (firmicutes) Pe161	CP025473.1
		Enterococcus sp. FDAARGOS_375 (firmicutes)	CP023515.1					vanC
		Enterococcus sp. FDAARGOS_553 (firmicutes)	CP033740.1					vanC
		Enterococcus sp. M190262 (firmicutes)	CP040461.1					tetO、vanC
		Enterococcus sp. CR-Ec1 (firmicutes)	CP025223.1					vanC
